# Supplementary material for: Sex steroids and sex steroid‐binding globulin levels amongst middle‐aged and elderly men and women from general population
Source: PubMed Central journal article supplement — Eur J Clin Invest. 2022 Sep 8;52(12):e13866. doi: 10.1111/eci.13866 (PMC9787498; doi:10.1111/eci.13866), 2022-09-08
Supplement: ECI-52-e13866-s001.pdf [file ECI-52-e13866-s001.pdf]

**Sex steroids and sex steroid-binding globulin levels among middle-aged and elderly men and women from general population**

E. Aribas, MD<sup>1</sup>; J.E. Roeters van Lennep, MD, PhD<sup>2</sup>; Y.B. De Rijke, PhD<sup>3</sup>; J.S.E. Laven, MD, PhD<sup>4</sup>; M.A. Ikram, MD, PhD<sup>1</sup>, R.P. Peeters, MD, PhD<sup>2</sup>; M. Kavousi, MD, PhD<sup>1</sup>

<sup>1</sup>Department of Epidemiology, Erasmus MC, University Medical Center Rotterdam, Rotterdam, the Netherlands

<sup>2</sup>Department of Internal Medicine, Erasmus MC, University Medical Center Rotterdam, Rotterdam, the Netherlands

<sup>3</sup>Department of Clinical Chemistry, Erasmus MC, University Medical Center Rotterdam, Rotterdam, the Netherlands

<sup>4</sup>Division of Reproductive Endocrinology and Infertility, Department of Obstetrics and Gynecology, Erasmus MC, University Medical Center Rotterdam, Rotterdam, the Netherlands

**Corresponding author:** Dr. M. Kavousi, MD, PhD

Department of Epidemiology, Na-2714, Erasmus Medical Center, University Medical Center. PO. Box 2040, 3000 CA Rotterdam, the Netherlands. Telephone number: +31107043997. Email: [m.kavousi@erasmusmc.nl](mailto:m.kavousi@erasmusmc.nl)

## Supplemental Material

**Supplemental fig. 1** Levels of DHEA, DHEAS, and androstenedione levels across age (N=3291)

**Supplemental fig. 2** Sex steroids and SHBG levels across age among obese and non-obese participants (N=3270)

**Supplemental fig. 3** Sex steroids and SHBG levels across age among postmenopausal women (N=1371)

**Supplemental fig. 1** Levels of DHEA, DHEAS, and androstenedione levels across age

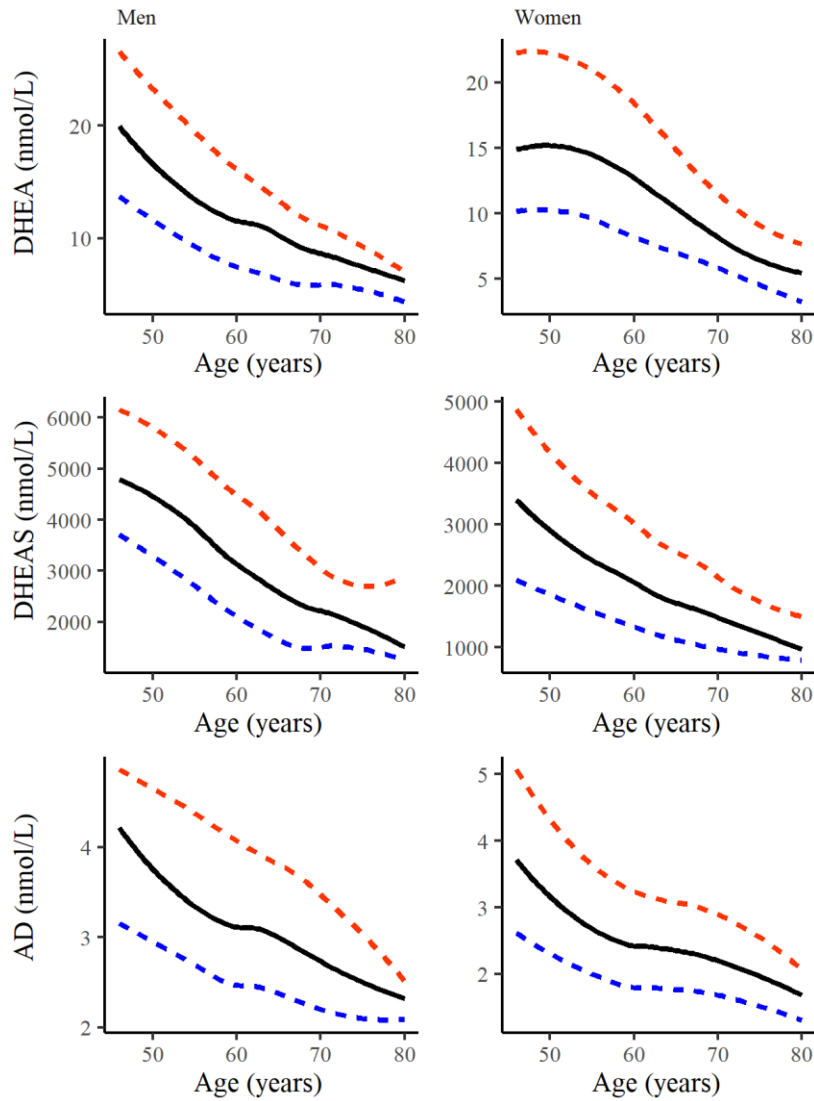

Smoothed percentile plots of DHEA, DHEAS, and androstenedione for each age-year in 1490 men (left) and 1801 women (right).

The median is a solid line, 25<sup>th</sup> and 75<sup>th</sup> percentile are depicted as dashed lines.

Abbreviations: DHEA; dehydroepiandrosterone, DHEAS; dehydroepiandrosterone sulfate, AD; androstenedione.

**Supplemental fig. 2** Sex steroids and SHBG levels across age among obese and non-obese participants

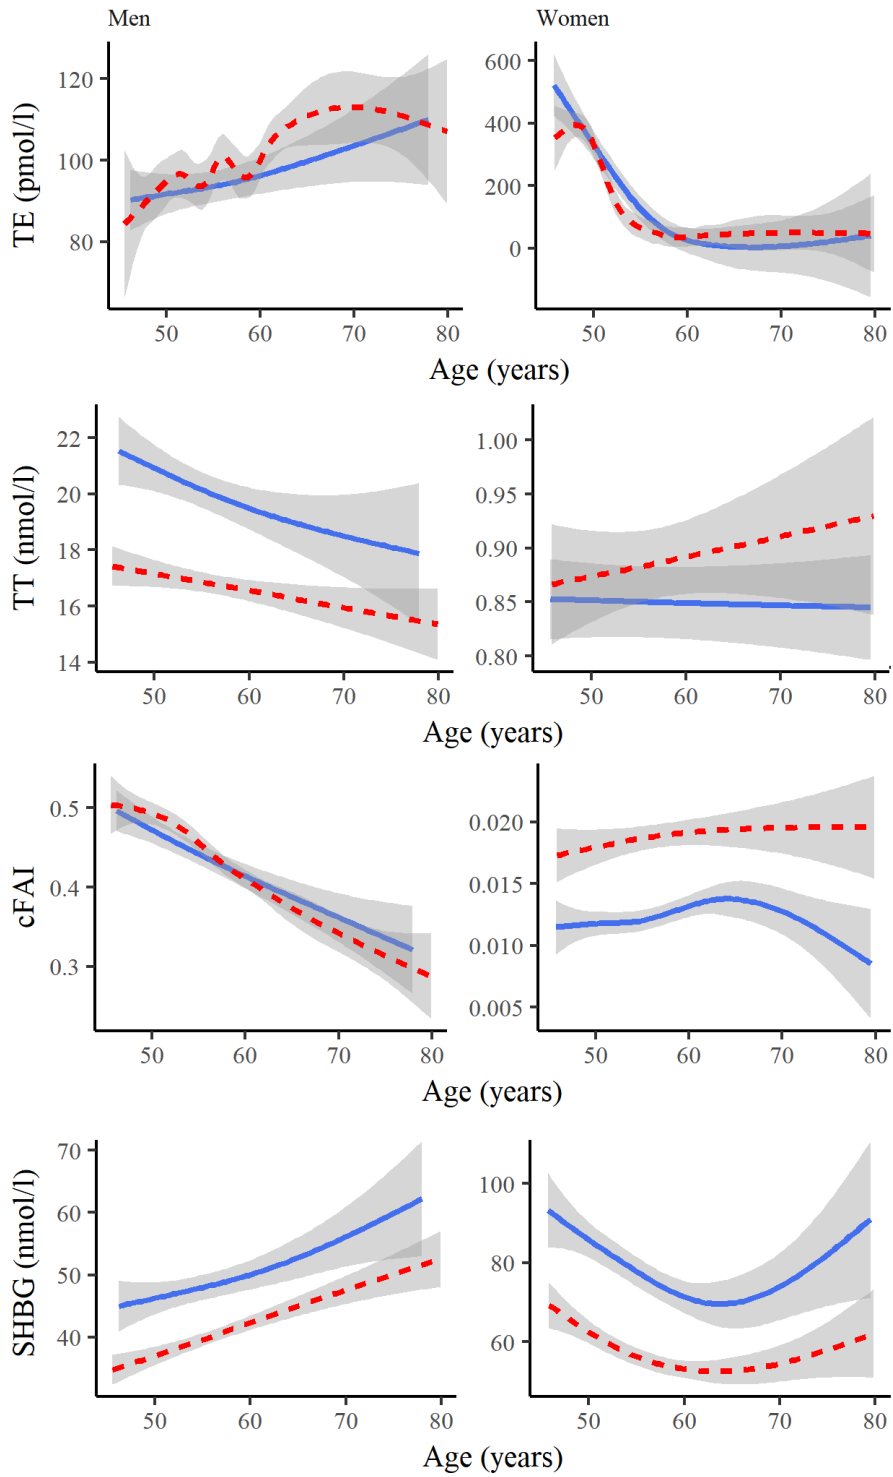

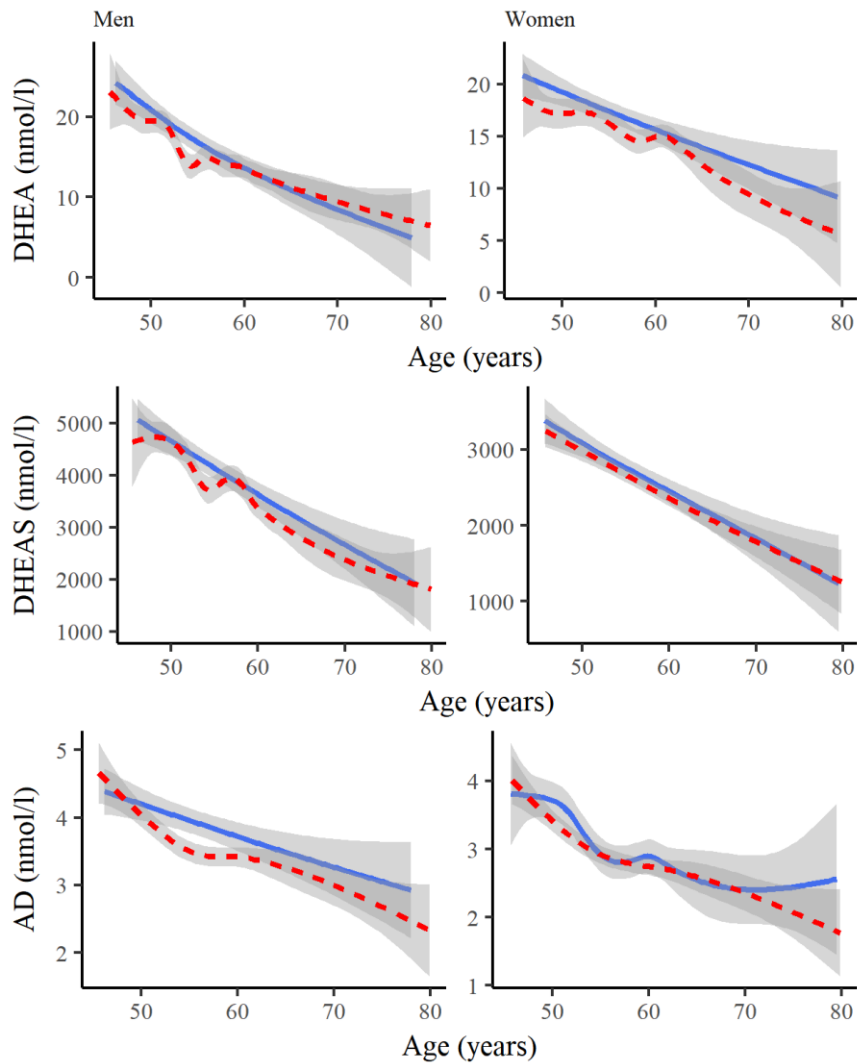

Solid lines (in blue) represent non-overweight participants. Dashed lines (in red) represent overweight participants. Gray area represent the 95% confidence intervals.

In men (N=1479), 349 participants non-overweight and 1130 participants were overweight. In women (N=1791), 589 participants were non-overweight and 1202 were overweight participants.

Abbreviations: TE; total estradiol, TT; total testosterone, cFAI; calculated free androgen index, SHBG; sex-hormone binding globulin, DHEA; dehydroepiandrosterone, DHEAS; dehydroepiandrosterone sulfate, AD; androstenedione, N=number.

**Supplemental fig. 3** Sex steroids and SHBG levels across age among postmenopausal women

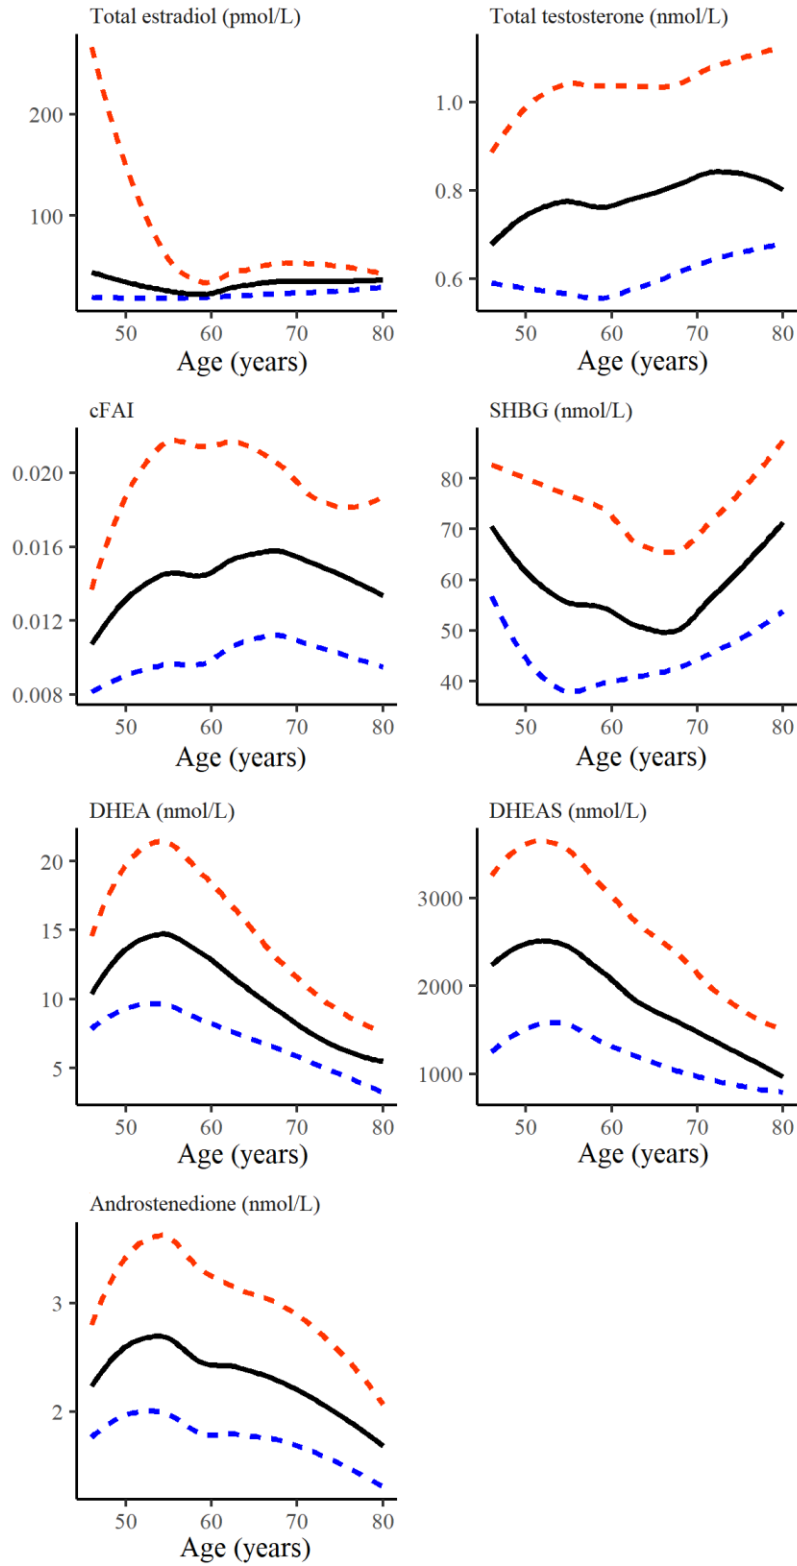

The median is a solid line, 25<sup>th</sup> and 75<sup>th</sup> percentile are depicted as dashed lines, among 1371 postmenopausal women.

Abbreviations: SHBG; sex-steroid binding globulin, cFAI; calculated free androgen index, DHEA; dehydroepiandrosterone, DHEAS; dehydroepiandrosterone sulfate, N; number.
